# Supplementary material for: Decoupling both local and global abundance from global range size, challenging the abundance-occupancy relationship in birds
Source: eLife. 2025 May 28;13:RP95857. doi: 10.7554/eLife.95857 (PMC12119083; doi:10.7554/eLife.95857)
Supplement: Supplementary file 3. [file elife-95857-supp3.docx]

**Supplementary file 3**

**Notations of statistical models used in this study (results of these models are in Supplementary file 1)**

| Fromula | Variance components (normally distributed with the mean of 0 and given values |
| --- | --- |
|  |  |
|  |  |
|  |  |
|  |  |
|  |  |
|  |  |

denotes the *i*th effect size, is the intercept, and are regression coeffects, is the kth country, is the *j*th state code and is the *i*th effect size, and z(ln(checklist duration)), Sampling-variance and log10(range size) are fixed effects (predictors; see Method).
